# Supplementary material
Source: publisher figshare collection journal article supplement (https://tandf.figshare.com/articles/dataset/_/12854102)
Supplement: Supplementary file 1 [file 1]

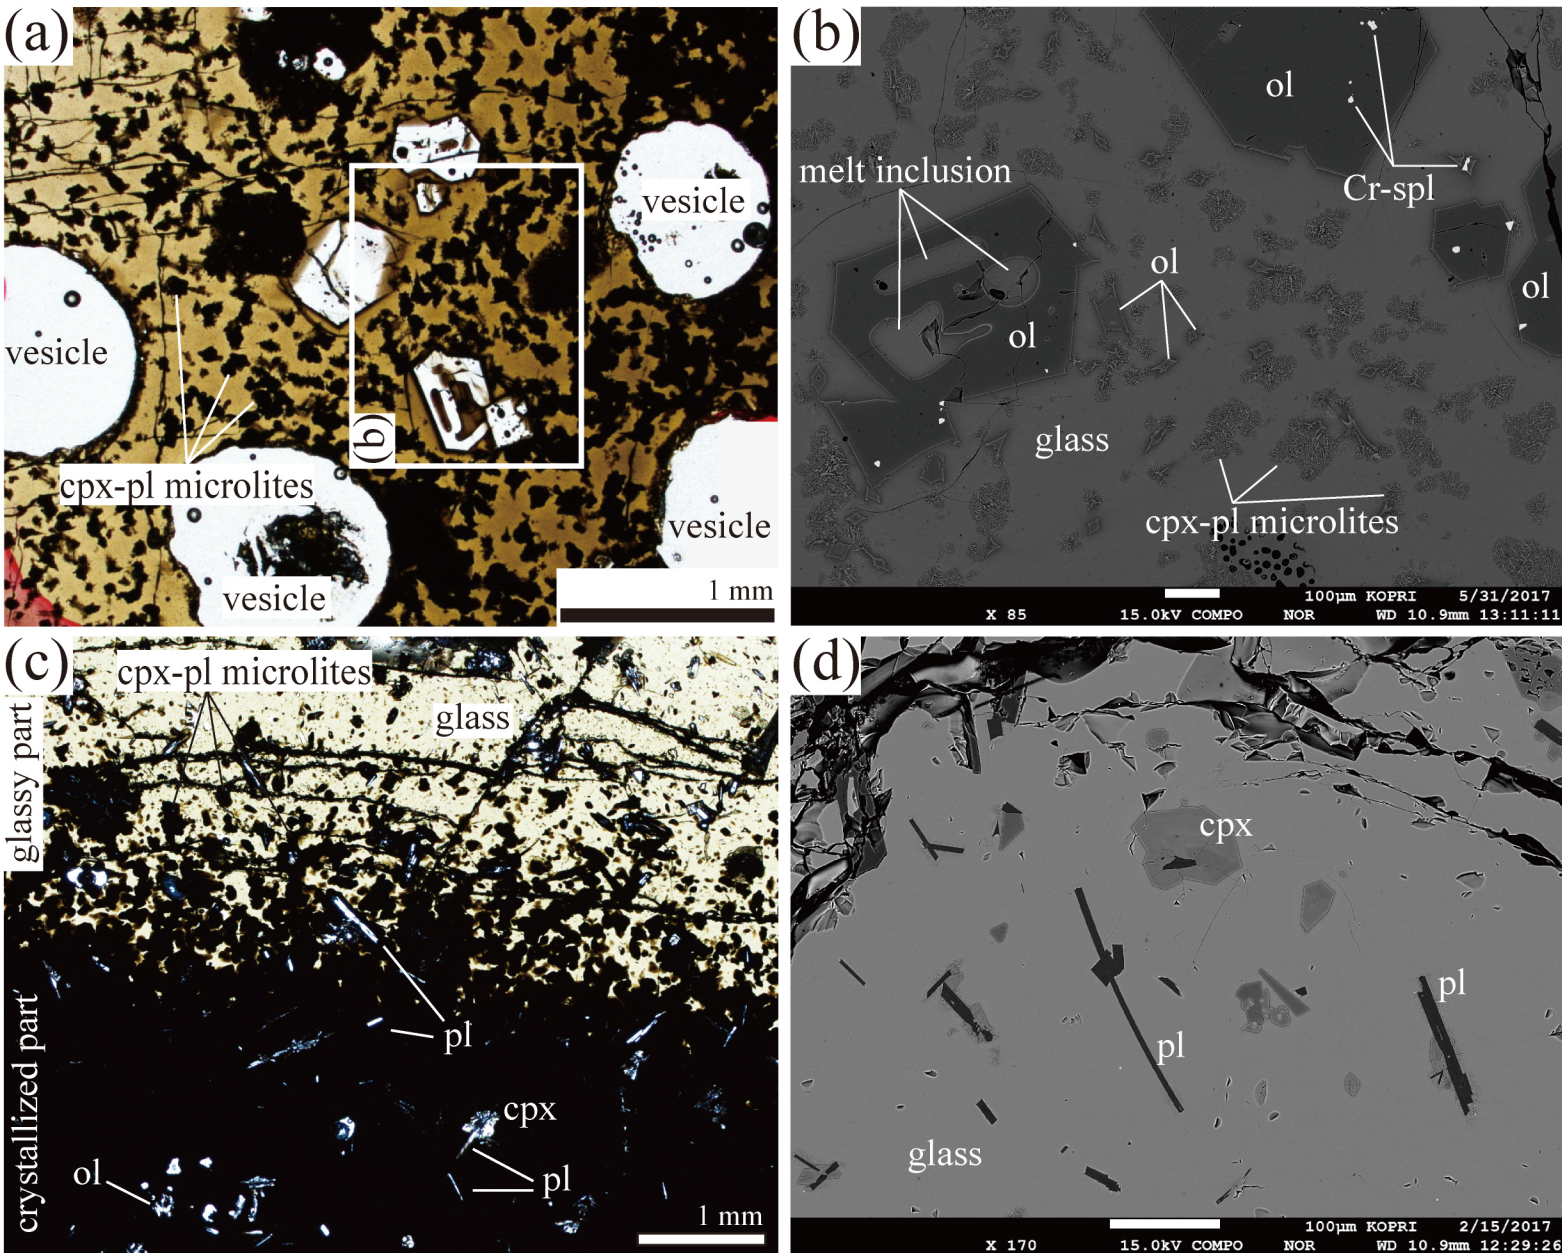

Supplementary Figure 1. Photomicrographs and backscattered electron (BSE) images of basalts in the KR1 Seamount Trail (KR1 ST): (a, b) glassy alkaline basalt (DG04-1) and (c, d) glassy tholeiite (DG05-1). Photomicrographs (a, c) were taken under plane-polarized light. Images were taken from Yi *et al.* (2019).
